# Supplementary material for: Australian children living with rare diseases: experiences of diagnosis and perceived consequences of diagnostic delays
Source: Springer Nature journal article supplement (doi:10.1186/s13023-017-0622-4), 2017-04-11
Supplement: MOESM1 [file 12213056]

# Living with Rare Disease: The Impacts on your Child and your Family

## INFORMATION STATEMENT

We would like to invite you to be a part of a project that looks at the experiences of families like yours, who are caring for a child with a rare disease or condition. There are approximately 8000 different rare diseases affecting an estimated 2 million Australians, including 400,000 Australian children. Approximately 70% of all rare diseases are of genetic origin; however, some are due to rare infections, injuries or mental health problems.

### ***What is the project about?***

For the first time in Australia, this project brings together a number of rare disease charitable organisations, to work with a nationally recognised research partner at the University of Sydney, the Australian Paediatric Surveillance Unit (APSU), to adopt a coordinated approach to the provision of better support services, educational opportunities, and information resources for families of children with rare diseases. This approach will greatly increase the awareness of rare diseases amongst the public and government sectors and provide a knowledge base about rare diseases for future research in this neglected area.

We have developed a survey for parents/carers of children with rare diseases to explore your experiences during the diagnosis period, the health related function of your child, the impact that caring for your child has had on your family and your experiences with Health and Support Services.

### ***What will it involve?***

You will be asked to complete a survey about your child(ren) **aged less than 19 years** with a rare disease/condition and your family and return it in a postage paid envelope. The survey will take about 1 hour to complete.

### ***What will happen to the information collected?***

#### **All information you provide is confidential.**

The information we collect will be anonymous, it will not contain your name, your child's name or contact details. Each survey will have a code attached that will be linked with each family. Only our organisation will have access to that code which will be kept in a secure database. Only the research team collecting the data will have access to your questionnaire answers but not any identifying information about you. All survey responses will be entered onto a computer protected by a password in a locked office in a secure building at the Children's Hospital at Westmead. Data from the study will be analysed and published, but will not contain any data which could identify individuals, including your child or your family. Only summary data will be published.

Feedback will be provided to you through our newsletters informing you of results and how they will be used to inform improvements to support services, educational opportunities and information resources for families such as yours.

*HREC 10/CHW/75, Version 7, 22.08.2014*

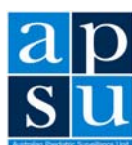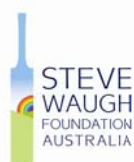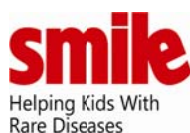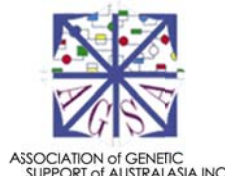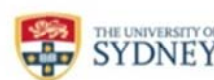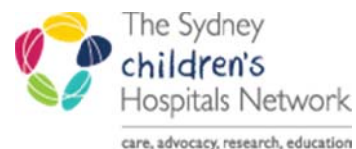

***Do I have to take part in the study?***

Participation in this survey is completely voluntary. If you do decide to be a part of this project, by completing the survey, you will be giving consent for us to use the anonymous information you have provided.

You are able to withdraw from the study at any time and this will not affect your relationship with any of the partner organisations in any way.

***Are there any concerns you have with the study?***

If you have any concerns or issues regarding this study or questions asked in the survey please contact the APSU on 02 9845 3005 or the Social Work Department at the Children's Hospital at Westmead on 02 9845 2608.

***Other information***

If you have any questions, feel free to contact us at any time.

If you have specific questions about the survey or the design of this research, please contact:

Dr Marie Deverell [marie.deverell@health.nsw.gov.au](mailto:marie.deverell@health.nsw.gov.au) or phone the Australian Paediatric Surveillance Unit on 02 9845 3005.

This research study has been approved by the Sydney Children's Hospitals Network, Human Research Ethics Committee (HREC reference number 10/CHW/75).

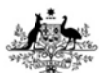

Australian Government  
Australian Research Council

This research is supported under the Australian Research Council's Linkage Projects funding scheme (project number LP110200277)

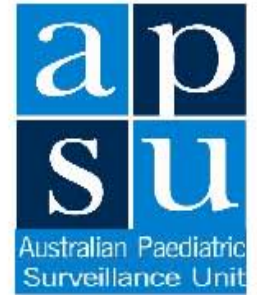

# Living with Rare Disease:

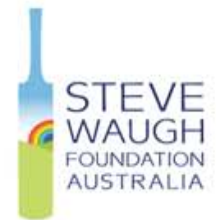

## The Impacts on your Child and your Family

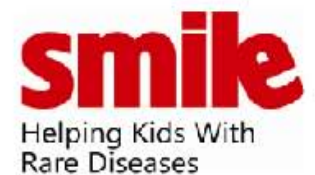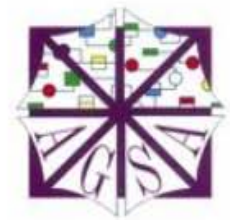

ASSOCIATION of GENETIC  
SUPPORT of AUSTRALASIA INC

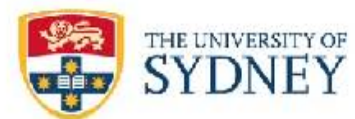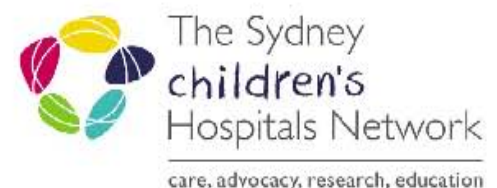

## Living with Rare Disease:

### The Impacts on your Child and your Family

#### INSTRUCTIONS FOR COMPLETION OF THE SURVEY

Thank you for your interest in taking part in this research project.

By completing and returning this survey you give consent to participate in this study, and so it is important that you understand what is required and how the information you provide will be treated and used. For this reason ***it is important that you read the information and instructions on this sheet carefully*** before deciding to complete and return the survey. If you have any questions please do not hesitate to contact the APSU (Phone: 02 9845 3005) or Dr Marie Deverell [marie.deverell@health.nsw.gov.au](mailto:marie.deverell@health.nsw.gov.au).

#### How to complete this survey

This survey has 15 pages and 8 sections:

- About you and your child
- Diagnosis
- Health Related Function
- Treatment
- Health Service Use
- Impact on Family
- Support and Information Needs
- Financial Support.

The questions concern you and your experiences whilst caring for your child or children who have a rare disease. You will need to complete a separate survey for each of your children as each child's transition journey will be different.

We estimate that it will take approximately one hour to complete the questionnaire. Please note that you need not complete it in one session.

Some questions will simply require you to choose an answer out of options we have provided by marking a box with an **X** or tick (✓), others will ask you to fill in the space provided by typing or writing.

Try to select the most appropriate answer to each question. In some instances you may not know the answer, so please tick the 'Don't Know' (DK) option. Some questions will ask you to complete them only if you answered yes to the question before it. Please follow the directions in the survey to ensure that you answer all required sections.

Please remember all the data is anonymous, so **please DO NOT write your name, address, phone number or any other information that might identify you on this survey**. Some questions ask about the diagnosis, how this was made and who made it. *To protect the privacy of the health professional(s) who might have been involved in the diagnosis, please DO NOT provide any information that might identify them (e.g. DO NOT provide any health professionals' names, phone numbers or places of work).*

Version 13: 22/08/2014

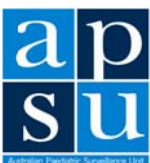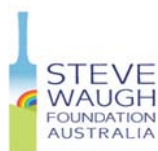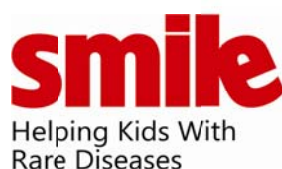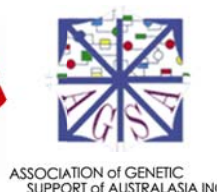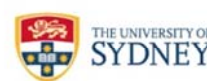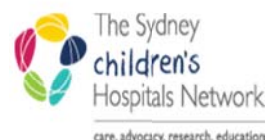

## Confidential

### ABOUT YOU AND YOUR CHILD

**Instructions:** Answer for the first affected child living in your household. Answer each question by ticking the appropriate box or writing your response in the space provided.

DK= Don't Know, NA = Not applicable

1. Who is completing this questionnaire?

- Mother
  Father
  Foster carer  
 Other (specify) \_\_\_\_\_

2. How old is your child with the rare disease? Years: \_\_\_\_\_ Months: \_\_\_\_\_

3. What is your child's gender?

- Male
  Female

4. What is the postcode of your current residence? □□□□

5. In which country was your child born? \_\_\_\_\_

6. Which of the following would best describe your child's ethnicity?

- Caucasian
  Aboriginal
  Torres Strait Islander
  Both Aboriginal and Torres Strait Islander  
 Asian
  Maori
  Pacific Islander
  Middle Eastern  
 African
  Other (specify) \_\_\_\_\_

7. What is the primary language spoken at home? \_\_\_\_\_

8. Has your child received a diagnosis?

- Yes. Which rare disease does your child have? \_\_\_\_\_  
 No

**If No**, please answer a) and b) below and then go to **question 27** on page 4

**a)** How old was your child when the symptoms or signs of disease first started?

Years: \_\_\_\_\_ Months: \_\_\_\_\_

**b)** How many doctors (approximately) were consulted about your child's first symptoms or signs of disease?

- 1 - 2
  3 - 5
  6 - 10
  11 - 20
  >20

9. Has anyone else in the family ever had this disease?

- Yes, specify relationship/s to the child (e.g. sister, etc): \_\_\_\_\_  
 No
  Don't know

### DIAGNOSIS

10. When was your child diagnosed?

- Before birth (specify circumstances, e.g. screening because of other cases in the family, routine screening, maternal illness during pregnancy, etc):  
 \_\_\_\_\_  
 \_\_\_\_\_

After birth (specify age): Years: \_\_\_\_\_ Months: \_\_\_\_\_

11. If diagnosed after birth, how old was your child when the symptoms or signs of the disease first started?

Years: \_\_\_\_\_ Months: \_\_\_\_\_  No signs/symptoms

Confidential

12. How many doctors (approximately) were consulted between first symptoms or signs of disease and the final diagnosis?

- 1 – 2       3 – 5       6 – 10       11 - 20       >20

13. Was your child given any other diagnoses before the final diagnosis was made?

- Yes       No       Don't know

a) **If yes**, please list all previous diagnoses given

---

b) **If yes**, do you believe this led to any unnecessary tests or treatment?

- Yes       No       Don't know

14. Who initially raised the possibility of your child's diagnosis?

- Geneticist       Neurologist       Paediatrician       Obstetrician  
 GP       Relative       Teacher  
 Other (including other specialist, etc): \_\_\_\_\_

15. Who made the final diagnosis?

- Geneticist       Neurologist       Paediatrician       Obstetrician  
 GP       Relative       Teacher  
 Other (including other specialist, etc): \_\_\_\_\_

16. Was the diagnosis made in a clinic specialising in your child's disease?

- Yes       No       Don't know

**If yes**, what was the setting for the clinic:

- Large metropolitan Children's Hospital  
 Other hospital (please specify) \_\_\_\_\_  
 Specialist (private rooms)  
 Other: \_\_\_\_\_

**If yes**, what led you to/how did you find this clinic?

- Recommended/referred by doctor  
 Recommended/referred by another health professional  
 Internet  
 Recommended by another patient or family  
 Other (specify): \_\_\_\_\_

**If yes**, where was this clinic in relation to your home at the time?

- Same city       Same state       Same country       Another country

17. How were you told about the diagnosis?

- Orally, if yes, please specify where (consultation room, corridor, waiting room): \_\_\_\_\_  
 By phone       In writing, with explanations       In writing without explanations  
 Other (specify): \_\_\_\_\_

18. Did you seek a second opinion to confirm the diagnosis?

- Yes       No

19. Do you believe that the diagnosis of your child's rare disease could have been made earlier?

- Yes       No       Don't know

a) **If yes**, why do you think the delay occurred? (Please tick all that apply)

**Confidential**

- Lack of knowledge among health professionals about the disease
- Tests not available for the disease
- Tests took a long time
- Long waiting period to see specialist
- Lack of family awareness at early stages
- Other (specify) \_\_\_\_\_

**b) If yes**, please state what (if any) consequences the delay had for you and your family:

---



---

**20.** Did your child's diagnosis lead you to move closer to medical facilities?  Yes  No

**a) If yes**, specify:

- Within same city
- Within same state
- Another state
- Another country

**21.** Were you offered counselling or psychological support at the time of diagnosis?  Yes  No

**a) If yes**, specify by whom:

- GP
- Specialist
- Genetic counsellor
- Psychologist
- Social worker
- Support group member
- Other \_\_\_\_\_

**b) If yes**, was ongoing counselling or psychological support offered?  Yes  No

**22.** Do you believe that counselling or psychological support should always be offered at the time of diagnosis?

- Yes
- No
- Don't know

**23.** What information would you like to be given at the time of diagnosis? *(Please tick all that apply):*

- Information about the disease and what causes it
- Support organisations related to the disease
- How the diagnosis will affect your child's daily life
- Prognosis or what to expect in the future
- Specialist medical centres related to the disease
- Respite care options

**24.** How would you like to receive this information? *(Please tick all that apply):*

- Written / pamphlet
- Orally
- Website reference
- Other: \_\_\_\_\_

**25.** Is your child's disease/condition genetic in origin?  Yes  No  Don't know

**If yes**, will this have an impact on future family planning?  Yes  No  Don't know  N/A

**If yes**, have you been offered genetic counselling?  Yes  No  Don't know

**26.** Overall, how satisfied were you with the way in which you were told of your child's final diagnosis?

- Very satisfied
- Satisfied
- Neutral
- Not satisfied
- Very unsatisfied

Please provide a brief statement on the reasons for your answer to the above question:

---



---

Confidential**HEALTH FUNCTIONING**

27. Please describe your child's health functioning according to the scale below:

*Tick the box which **BEST** describes how your child is **NOW**, compared with other children of the same age. Don't worry if some parts of the description do not apply to your child. Just choose the **BEST** description.*

| CATEGORY                                                                                    | TICK ONE ONLY | DESCRIPTION TO HELP                                                                                                                                                                                                                                                                                                                                                 |
|---------------------------------------------------------------------------------------------|---------------|---------------------------------------------------------------------------------------------------------------------------------------------------------------------------------------------------------------------------------------------------------------------------------------------------------------------------------------------------------------------|
| <b>Superior</b>                                                                             | [    ]        | No symptoms; physically able; excellent relationships with family and friends; wide range of extra-curricular activities; doing well at school/preschool; developing normally; everyday problems never get out of hand.                                                                                                                                             |
| <b>Good in all areas</b>                                                                    | [    ]        | Virtually no symptoms; usually copes well; physically able; good relationships; normal play & leisure activities; school/preschool OK; may have problems when stressed but these are short lived and only occasionally get out of hand.                                                                                                                             |
| <b>No more than slight problems</b>                                                         | [    ]        | Some significant symptoms, only briefly get out of hand; sometimes child gets distressed; short term or little interference with mobility or relationships or play & leisure activities; school/preschool may be slightly affected or affected for a short time.                                                                                                    |
| <b>Some difficulty in a single area but generally pretty well</b>                           | [    ]        | Mild symptoms which recover quickly with treatment; any distress or disability does not stop child from doing most things at that age; some anxiety or irritability or brief mood changes; minor effect on mobility or school/preschool or relationships or play & leisure activities; problems may persist but may only be recognized by those who know the child. |
| <b>Variable problems in some but not all areas</b>                                          | [    ]        | Moderate symptoms have significant disabling effect on child; minor to moderate effect on mobility; school/preschool may be affected; may need special education; in some situations may seem O.K.; mainly managed in outpatient clinic or family doctor.                                                                                                           |
| <b>Severe problems in one area <u>OR</u> moderate problems in most areas</b>                | [    ]        | Severe symptoms having a major effect on child's life; restricted mobility; relationships or play & leisure activities are affected; child is distressed or has difficult behavior; some relationships are maintained; learning difficulties or problems with or missing school; likely to have been seen by specialist.                                            |
| <b>Major problems in several areas <u>AND</u> unable to function in one of these areas.</b> | [    ]        | Severe, almost constant symptoms; child is distressed, withdrawn or has strange or aggressive behaviour; significant limitations on mobility or school/preschool or relationships or play & leisure activities; specialist management needed.                                                                                                                       |
| <b>Unable to function in almost all areas</b>                                               | [    ]        | Very severe symptoms; child is very distressed; likely to be confined to bed; unable to go to school/preschool; may be in hospital but child is not entirely dependent on others.                                                                                                                                                                                   |
| <b>Needs nursing supervision</b>                                                            | [    ]        | Confined to bed; in hospital; very severe symptoms but stable; needs help with self-care which a child the same age can do without help.                                                                                                                                                                                                                            |
| <b>Needs constant supervision</b>                                                           | [    ]        | High (24 hrs) medical dependence e.g. In intensive care unit; life-threatening symptoms.                                                                                                                                                                                                                                                                            |

<sup>1</sup> Dosseter DR, Liddle JL, Mellis CM. Measuring health outcome in paediatrics: development of the RAHC measure of function. *J Paediatr. Child Health.* 1996; 32(6):519-24.



Confidential**HEALTH FUNCTION – (for children 5 years old or more)**

Please complete this section if your child is **5 years old or more only**.

If your child is 4 years old or younger, please **Go to Question 43 on page 7**

For each **of the next 15 questions**, please select **ONE** answer that best describes your child's level of ability or disability during the **past 2 weeks**. Although a few questions are similar, please excuse the overlap and answer each question independently.

**28.** Which **ONE** of the following best describes your child's ability, during the **past 2 weeks**, to see well enough to read ordinary newspaper?

- a. Able to see well enough without glasses or contact lenses.  
 b. Able to see well enough with glasses or contact lenses.  
 c. Unable to see well enough even with glasses or contact lenses.  
 d. Unable to see at all.

**29.** Which **ONE** of the following best describes your child's ability, during the **past 2 weeks**, to see well enough to recognize a friend on the other side of the street?

- a. Able to see well enough without glasses or contact lenses.  
 b. Able to see well enough with glasses or contact lenses.  
 c. Unable to see well enough even with glasses or contact lenses.  
 d. Unable to see at all.

**30.** Which **ONE** of the following best describes your child's ability, during the **past 2 weeks**, to hear what was said in a group conversation with at least three other people?

- a. Able to hear what was said with out a hearing aid.  
 b. Able to hear what was said with a hearing aid.  
 c. Unable to hear what was said even with a hearing aid.  
 d. Unable to hear what was said, but did not wear a hearing aid  
 e. Unable to hear at all.

**31.** Which **ONE** of the following best describes your child's ability, during the **past 2 weeks**, to hear what was said in a conversation with one other person in a quiet room?

- a. Able to hear what was said without a hearing aid.  
 b. Able to hear what was said with a hearing aid.  
 c. Unable to hear what was said even with a hearing aid.  
 d. Unable to hear what was said, but did not wear a hearing aid.  
 e. Unable to hear at all.

**32.** Which **ONE** of the following best describes your child's ability, during the **past 2 weeks**, to be understood when speaking his/her own language with people who do not know the child?

- a. Able to be understood completely.  
 b. Able to be understood partially.  
 c. Unable to be understood.  
 d. Unable to speak at all.

**33.** Which **ONE** of the following best describes your child's ability, during the **past 2 weeks**, to be understood when speaking with people who know the child well?

- a. Able to be understood completely       c. Unable to be understood  
 b. Able to be understood partially       d. Unable to speak at all

**34.** Which **ONE** of the following best describes your child's feelings during the **past 2 weeks**?

- a. Happy and interested in life       d. Very unhappy  
 b. Somewhat happy       e. So unhappy that life was not worthwhile  
 c. Somewhat unhappy

## Confidential

**35.** Which ONE of the following best describes the pain and discomfort your child has experienced during the past 2 weeks?

- a. Free of pain or discomfort.
- b. Mild or moderate pain or discomfort that prevented no activities.
- c. Moderate pain or discomfort that prevented some activities.
- d. Moderate to severe pain or discomfort that prevented some activities.
- e. Severe pain or discomfort that prevented most activities.

**36.** Which ONE of the following best describes your child's ability, during the past 2 weeks, to walk?

**Note:** Walking equipment refers to mechanical supports such as braces, a cane, crutches or a walker.

- a. Able to walk around the neighborhood without difficulty, and without walking equipment.
- b. Able to walk around the neighborhood with difficulty, but did not require walking equipment or the help of another person.
- c. Able to walk around the neighborhood with walking equipment, but without the help of another person.
- d. Able to walk only short distances with walking equipment, and required a wheelchair to get around the neighbourhood.
- e. Unable to walk alone, even with walking equipment. Able to walk short distances with the help of another person, and required a wheelchair to get around the neighbourhood.
- f. Unable to walk at all.

**37.** Which ONE of the following best describes your child's ability, during the past 2 weeks, to use his/her hands and fingers?

**(Note:** Special tools refers to hooks for buttoning clothes, gripping devices for opening jars or lifting small items, and other devices to compensate for limitations of hands or fingers.

- a. Full use of two hands and ten fingers.
- b. Limitations in the use of hands or fingers, but did not require special tools or the help of another person.
- c. Limitations in the use of hands or fingers, independent with use of special tools (did not require the help of another person).
- d. Limitations in the use of hands or fingers, required the help of another person for some tasks (not independent even with use of special tools).
- e. Limitations in the use of hands or fingers, required the help of another person for most tasks (not independent even with use of special tools).
- f. Limitations in the use of hands or fingers, required the help of another person for all tasks (not independent even with use of special tools).

**38.** Which ONE of the following best describes your child's ability, during the past 2 weeks, to remember things?

- a. Able to remember most things.
- b. Somewhat forgetful.
- c. Very forgetful.
- d. Unable to remember anything at all.

**39.** Which ONE of the following best describes your child's ability, during the past 2 weeks, to think and solve day to day problems?

- a. Able to think clearly and solve day to day problems.
- b. Had a little difficulty when trying to think and solve day to day problems.
- c. Had some difficulty when trying to think and solve day to day problems.
- d. Had great difficulty when trying to think and solve day to day problems.
- e. Unable to think or solve day to day problems.

**40.** Which ONE of the following best describes your child's ability, during the past 2 weeks, to perform basic activities?

- a. Eat, bathe, dress and use the toilet normally.
- b. Eat, bathe, dress or use the toilet independently with difficulty.
- c. Required mechanical equipment to eat, bathe, dress or use the toilet independently.
- d. Required the help of another person to eat, bathe, dress or use the toilet.

**Confidential**

41. Which ONE of the following best describes your child's feelings during the past 2 weeks?

- a. Generally happy and free from worry.
- b. Occasionally fretful, angry, irritable, anxious or depressed.
- c. Often fretful, angry, irritable, anxious or depressed.
- d. Almost always fretful angry, irritable, anxious or depressed.
- e. Extremely fretful angry, irritable, anxious or depressed; to the point of needing professional help.

42. Which ONE of the following best describes the pain or discomfort your child has experienced during the past 2 weeks?

- a. Free of pain and discomfort.
- b. Occasional pain or discomfort. Discomfort relieved by non-prescription drugs or self-control activity without disruption of normal activities.
- c. Frequent pain or discomfort. Discomfort relieved by oral medicines with occasional disruption of normal activities.
- d. Frequent pain or discomfort; frequent disruption of normal activities. Discomfort required prescription narcotics for relief.
- e. Severe pain or discomfort. Pain not relieved by drugs and constantly disrupted normal activities.

Health Utilities Index Mark 2 and Mark 3 (HUI 2/3) 15-item Questionnaire  
©Health Utilities Inc., Dundas ON Canada

**HEALTH AND FUNCTION**

43. Please indicate if your child currently uses any of the following to help their hearing or speech:

- Cochlear implant     Grommets     Sign language
- Other (specify) \_\_\_\_\_

44. Please indicate if your child uses any of the following equipment for movement:

- Wheelchair     Crutches     Canes     Leg/arm braces
- Hand rails     Other (Specify) \_\_\_\_\_

45. Has your child ever had surgery to help with their movement, eyesight, hearing or speech?

- Yes,     No

*If yes, please specify;* \_\_\_\_\_

46. Over the last month has your child experienced pain related to their disease?

- Yes     No     Don't know

47. If your child experiences pain related to their disease, please indicate methods currently used for pain relief:

- Medications (please specify drugs) \_\_\_\_\_
- Physiotherapy     Massage     Occupational therapy
- Other (e.g. Music therapy, etc): \_\_\_\_\_

48. Is there any additional equipment, medications or services that have been recommended to you related to the care of your child that you have NOT been able to access/use?

- Yes     No     Don't know

*If yes, please specify what has been recommended and why you have not been able to access or use it:*

\_\_\_\_\_  
\_\_\_\_\_

Confidential

**TREATMENT**

**49.** Are you aware of specific medicines for your child’s condition?

- Yes       No       No effective medicines known

**If no**, please go to question 51

**If yes**, please specify: \_\_\_\_\_

**If yes**, is your child being treated with this medicine(s)?

- Yes       No

**If yes**, how do you access this medicine? (e.g. clinical trial, orphan drug program, etc)

\_\_\_\_\_

**If yes**, do you access this medicine(s) in

- Australia       Overseas, please specify where: \_\_\_\_\_

**50.** Have there been barriers to accessing these medicines for your child?

- Yes       No

**If yes**, please specify: \_\_\_\_\_

\_\_\_\_\_

**51.** Is your child currently using other treatments e.g. special diets or dietary supplements?

- Yes       No

**If yes**, please indicate

- Dietary supplements       Special Diet  
 Alternate or complementary medicines, please specify \_\_\_\_\_  
 Other, please specify \_\_\_\_\_

Confidential

**HEALTH SERVICE USE**

**52.** From the list below, please tick all of Specialist Doctors that are involved in your child's care, and estimate how often you visited them *in the last 12 months in an outpatient or a private clinic (excluding overnight admissions to hospital ward)*:

| Doctors seen in last 12 months                  | Number of visits | Number of Visits not covered by Medicare |
|-------------------------------------------------|------------------|------------------------------------------|
| <input type="checkbox"/> GP/family doctor       | _____            | _____                                    |
| <input type="checkbox"/> Paediatrician          | _____            | _____                                    |
| <input type="checkbox"/> Cardiologist           | _____            | _____                                    |
| <input type="checkbox"/> Rheumatologist         | _____            | _____                                    |
| <input type="checkbox"/> Dermatologist          | _____            | _____                                    |
| <input type="checkbox"/> Respiratory physician  | _____            | _____                                    |
| <input type="checkbox"/> Geneticist             | _____            | _____                                    |
| <input type="checkbox"/> Eye specialist         | _____            | _____                                    |
| <input type="checkbox"/> Psychiatrist           | _____            | _____                                    |
| <input type="checkbox"/> Neurologist            | _____            | _____                                    |
| <input type="checkbox"/> Pain specialist        | _____            | _____                                    |
| <input type="checkbox"/> Surgeon (Specify type) | _____            | _____                                    |
| <input type="checkbox"/> Other (Please specify) | _____            | _____                                    |

**53.** From the list below, please tick all of the Health Professionals (other than Specialists) that are involved in your child's care, and estimate how often you visited them *in the last 12 months*:

| Other Health Professionals seen in last 12 months | Number of visits | Number of Visits not covered by Medicare |
|---------------------------------------------------|------------------|------------------------------------------|
| <input type="checkbox"/> Physiotherapist          | _____            | _____                                    |
| <input type="checkbox"/> Speech Pathologist       | _____            | _____                                    |
| <input type="checkbox"/> Occupational Therapist   | _____            | _____                                    |
| <input type="checkbox"/> Optometrist              | _____            | _____                                    |
| <input type="checkbox"/> Psychologist             | _____            | _____                                    |
| <input type="checkbox"/> Social Worker            | _____            | _____                                    |
| <input type="checkbox"/> Dietician                | _____            | _____                                    |
| <input type="checkbox"/> Genetic Counsellor       | _____            | _____                                    |
| <input type="checkbox"/> Dentist                  | _____            | _____                                    |
| <input type="checkbox"/> Specialist Nurse         | _____            | _____                                    |
| <input type="checkbox"/> Other (Please specify)   | _____            | _____                                    |

**Confidential**

**54.** Please estimate the number of hospital *admissions* (admitted to a hospital ward) your child had over the past 12 months? \_\_\_\_\_

**55.** How many hospital *visits* (other than admissions with stay *less than 8 hours* e.g. to emergency or to other hospital clinics) has your child had over the past 12 months?

a) Number of Emergency Presentations \_\_\_\_\_

b) Total number of visits to hospital clinic or therapist \_\_\_\_\_

**56.** Does your child attend a specialist disease clinic? (e.g. Rett syndrome, Metabolic Diseases)  
(Note: a *specialist clinic* is a centre offering care for a specific disease or group of diseases)

Yes, what is the name of the clinic? \_\_\_\_\_

No

**57.** Are you currently accessing support services (OT, Speech or Physiotherapy) through the Department of Ageing Disability and Home Care?

Yes       No

**58.** In your opinion, do you have adequate access to all the health services your child needs?

Yes       No       Unsure

**If No,** what health care related needs of your child, do you believe are currently not met? \_\_\_\_\_

**59.** What are the barriers you currently experience in visiting Specialist Doctors? (*tick ALL options that apply*)

- |                                                  |                                                            |
|--------------------------------------------------|------------------------------------------------------------|
| <input type="checkbox"/> No barriers             | <input type="checkbox"/> Personal financial cost           |
| <input type="checkbox"/> Transport               | <input type="checkbox"/> Time off work                     |
| <input type="checkbox"/> Distance of travel      | <input type="checkbox"/> Lack of available health services |
| <input type="checkbox"/> Care for other siblings | <input type="checkbox"/> Lack of referral                  |
| <input type="checkbox"/> Long waiting period     | <input type="checkbox"/> Other (please specify)            |

**60.** What are the barriers you experience in visiting Other Health Professionals? (*tick ALL options that apply*):

- |                                                  |                                                            |
|--------------------------------------------------|------------------------------------------------------------|
| <input type="checkbox"/> No barriers             | <input type="checkbox"/> Personal financial cost           |
| <input type="checkbox"/> Transport               | <input type="checkbox"/> Time off work                     |
| <input type="checkbox"/> Distance of travel      | <input type="checkbox"/> Lack of available health services |
| <input type="checkbox"/> Care for other siblings | <input type="checkbox"/> Lack of referral                  |
| <input type="checkbox"/> Long waiting period     | <input type="checkbox"/> Other (please specify)            |

**Confidential**

**61.** Please indicate how strongly you agree/disagree with the following statements about the health care of your child:

| <b>Statement</b>                                                                                                                                                                                           | <b>Strongly Agree</b> | <b>Agree</b> | <b>Unsure</b> | <b>Disagree</b> | <b>Strongly Disagree</b> |
|------------------------------------------------------------------------------------------------------------------------------------------------------------------------------------------------------------|-----------------------|--------------|---------------|-----------------|--------------------------|
| (a) The role of a GP should be to help coordinate the diverse health requirements of your child                                                                                                            |                       |              |               |                 |                          |
| (b) Your GP has adequate knowledge of your child's rare disease                                                                                                                                            |                       |              |               |                 |                          |
| (c) Allied health services (physiotherapist, occupational therapists, etc) involved in the care of your child have adequate knowledge of your child's rare disease                                         |                       |              |               |                 |                          |
| (d) An electronic record of your child's medical history accessible to doctors and hospitals would be an advantage when dealing with the health system                                                     |                       |              |               |                 |                          |
| (e) A specialised centre housing many multidisciplinary health services (medical consultations, genetic advice, physiotherapy, etc) in one location would improve your experience in accessing health care |                       |              |               |                 |                          |
| (f) You find acquiring and organising specialised equipment for your child easy to arrange/acquire                                                                                                         |                       |              |               |                 |                          |
| (g) You have a health professional involved in the care of your child who coordinates all aspects of your child's health care needs (case manager/coordinator)                                             |                       |              |               |                 |                          |
| If you ticked agree or strongly agree, which type of health professional takes on the role of case manager/coordinator? (e.g. specialist, GP, nurse)                                                       |                       |              |               |                 |                          |

Confidential**IMPACT ON FAMILY****62. Please indicate (x) how strongly you agree/disagree with the following statements:**

| <b>Statement</b>                                                                                                     | <b>Strongly Agree</b> | <b>Agree</b> | <b>Disagree</b> | <b>Strongly Disagree</b> |
|----------------------------------------------------------------------------------------------------------------------|-----------------------|--------------|-----------------|--------------------------|
| Additional income is needed in order to cover medical expenses                                                       |                       |              |                 |                          |
| The illness is causing financial problems for the family                                                             |                       |              |                 |                          |
| Time is lost from work because of hospital appointments                                                              |                       |              |                 |                          |
| I am cutting down the hours I work to care for my child                                                              |                       |              |                 |                          |
| Our family gives up things because of my child's illness                                                             |                       |              |                 |                          |
| People in the neighbourhood treat us as special because of my child's illness                                        |                       |              |                 |                          |
| We see family and friends less because of the illness                                                                |                       |              |                 |                          |
| I don't have much time left over for other family members after caring for my child                                  |                       |              |                 |                          |
| We have little desire to go out because of my child's illness                                                        |                       |              |                 |                          |
| Because of the illness, we are not able to go on holidays away from home                                             |                       |              |                 |                          |
| Sometimes we have to change plans about going out at the last minute because of my child's state                     |                       |              |                 |                          |
| Sometimes I wonder whether my child should be treated 'specially' or the same as a normal child                      |                       |              |                 |                          |
| I think about not having more children because of the illness                                                        |                       |              |                 |                          |
| Nobody understands the burden I carry                                                                                |                       |              |                 |                          |
| Travelling to hospital is a strain on me                                                                             |                       |              |                 |                          |
| Sometimes I feel like we live on a roller coaster: in crisis when my child is acutely ill, ok when things are stable |                       |              |                 |                          |
| It is hard to find a reliable person to take care of my child                                                        |                       |              |                 |                          |
| I live from day to day and don't plan for the future                                                                 |                       |              |                 |                          |
| Fatigue is a problem for me because of my child's illness                                                            |                       |              |                 |                          |
| Learning to manage my child's illness has made me feel better about myself                                           |                       |              |                 |                          |
| Because of what we have shared we are a closer family                                                                |                       |              |                 |                          |
| My partner and I discuss our child's problems together                                                               |                       |              |                 |                          |
| We try to treat our child as if he/she were a normal child                                                           |                       |              |                 |                          |
| My relatives have been understanding and helpful with my child                                                       |                       |              |                 |                          |

1.Stein RE, Reissman CK. The development of an impact-on-family scale: preliminary findings. *Med Care*. 1980; 18(4):465-72.



Confidential**FAMILY SUPPORT SERVICES AND INFORMATION NEEDS**

63. Have you found an organisation or support group within Australia specific to your child's disease?

- Yes                       No **If No, go to *question 66***                       Don't know

64. Please name any support groups or organisations you are involved with:

---

65. How did you find the relevant support groups and organisations?

- Doctors       Internet       Press/media/advertisements       Other patients and families  
 Friends       Other (please specify): \_\_\_\_\_

66. Have you searched for or used a support group or organisation overseas?

- Yes                       No

**If yes, what are your reasons?**

- No group exists in Australia                       Recommended to you  
 Better services offered (please specify) \_\_\_\_\_  
 Other (please specify) \_\_\_\_\_

67. Were you made aware of support groups/organisations at the time of diagnosis?

- Yes                       No                       Don't know       My child does not have a diagnosis yet

68. How interested are you in finding and utilising support groups and organisations?

- Very interested                       Interested  
 Not really interested                       Not at all interested

69. In your opinion, should information about support groups/organisations be offered at diagnosis?

- Yes                       No                       Don't know

70. Are you interested in being in contact with other families or patients with the same or similar disease?

- Very interested       Interested       Not really interested       Not at all interested

71. Are you currently in contact with other families or patients with the same or similar disease?

- Yes                       No

**If yes, by what means do you communicate? (please tick ALL options that apply)**

- In person       By e-mail       The internet (e.g. Facebook)       By phone  
 Other (specify): \_\_\_\_\_

72. Do you believe you have been provided with adequate information about your child's rare disease?

- Yes                       No                       Don't know

73. Where did you get information about your child's rare disease? (*tick ALL options that apply*)

- GP                       Specialist                       Internet                       Other parents/families  
 Support groups       Brochures/pamphlets       Other (specify) \_\_\_\_\_

Confidential

**74.** How would you prefer to learn about your child's disease? (*Tick ALL options that apply*):

- From your GP       From a specialist       Other parents/families  
 Internet       Support groups       Brochures/pamphlets

Other method (please specify): \_\_\_\_\_

**75.** Have you had the opportunity to attend educational sessions/workshops about your child's rare disease?

- Yes       No

*If yes*, please provide details: \_\_\_\_\_

Who provided the sessions? \_\_\_\_\_

**76. How often** have you felt stressed over the past month? ( please tick **ONE** option)

- Never       Rarely       Occasionally       Frequently       Always

**77. How stressed** have you felt over the past month? ( please tick **ONE** option)

- Not stressed       A little stressed       A lot stressed       Highly stressed

**78.** Are you currently receiving psychological support from any of the following (tick **ALL options** that apply)

- Psychologist       Psychiatrist       Counsellor       Social worker       General practitioner  
 Other \_\_\_\_\_

**79.** If you are **not receiving** psychological support would you like access to this type of assistance?

- Yes       No

If YES, why have you not been able to access this type of support (please comment)

\_\_\_\_\_

**80.** Does your child have any brothers or sisters?

- Yes, please state how many, their sex and ages \_\_\_\_\_

\_\_\_\_\_

- No, *if no* please go to **question 83**

**Confidential**

**81.** Please indicate how strongly you agree with the following statements about the affected child’s siblings over the last 12 months;

| Statement                                                                  | Strongly agree | Agree | Unsure | Disagree | Strongly disagree |
|----------------------------------------------------------------------------|----------------|-------|--------|----------|-------------------|
| Siblings receive less of my attention                                      |                |       |        |          |                   |
| Siblings take on more responsibility for household chores                  |                |       |        |          |                   |
| Siblings have less opportunity for play or free time                       |                |       |        |          |                   |
| Siblings miss out on outings with friends more often                       |                |       |        |          |                   |
| Siblings have missed school days as a result of child’s needs              |                |       |        |          |                   |
| Siblings display anger or frustration about the affected child’s needs     |                |       |        |          |                   |
| I expect siblings to help out with affected child’s needs                  |                |       |        |          |                   |
| I expect the girls to help out more than the boys ( <i>if applicable</i> ) |                |       |        |          |                   |
| I have concerns about siblings’ emotional well-being                       |                |       |        |          |                   |

**82.** Please indicate how strongly you agree/disagree with the following statements about your affected child’s siblings:

| Statement                                                    | Strongly agree | Agree | Unsure | Disagree | Strongly disagree |
|--------------------------------------------------------------|----------------|-------|--------|----------|-------------------|
| Siblings had to “grow-up” more quickly than others their age |                |       |        |          |                   |
| Siblings are well informed about the child’s condition       |                |       |        |          |                   |

**FINANCIAL SUPPORT**

**83.** Do you have private health insurance?

- Yes       No

**84.** Are you receiving financial assistance from government-based programs (e.g. Carer’s allowance, Disability Allowance, etc)?

- Yes, please specify \_\_\_\_\_  
 No

**85.** Did you have to pay additional expenses not covered by Medicare while seeking a diagnosis (e.g. tests, procedures)?

- Yes       No       Don’t know

**a)** *If yes*, please estimate the approximate amount you spent:

\$ \_\_\_\_\_

**b)** *If yes*, did this cause financial stress for the family?  Yes       No       DK

Confidential

**86.** Please estimate out of pocket health related expenses over the past 12 month period (travel, doctor visits, equipment, medications, other). *Please tick the box that best applies:*

- <\$500                       \$500-2000                       \$2000-5000                       >\$5000

**87.** Is the financial assistance you receive adequate to cover the cost of caring for your child?

- More than adequate     Adequate     Not adequate     Not at all adequate

**If not adequate**, please specify what is not covered:

- Transport                       Equipment     Medications                       Health services  
 Other (specify) \_\_\_\_\_

**88.** Do you feel that you have been provided with adequate information about financial assistance related to caring for your child?

- Yes                       No                       Don't know

**89.** Do you feel you have been provided with adequate information about you and your child's legal and social rights (e.g. access to education, etc)?

- Yes                       No

Please comment:

---

---

---

---

**RESEARCH**

**90.** Would you be interested in being kept regularly informed of current research and clinical trials related to your child's rare disease?

- Yes                       No                       Don't know

**91.** Are you interested in participating in relevant research studies into your child's rare disease?

- Yes                       No                       Don't know

**92.** Feel free to make any other comments here:

---

---

---

**THANK YOU**

***We appreciate the time you have taken to finish this survey. The information gained from this survey will be valuable in developing better health services and supports for your child, you and your family.***

***Please return survey to:***

***Australian Paediatric Surveillance Unit  
Kids Research Institute, The Children's Hospital Westmead  
Locked Bag 4001, Westmead NSW 2145***

***Should you have any questions about this study please don't hesitate to contact***

***Dr Marie Deverell on: 02 9845 3005***

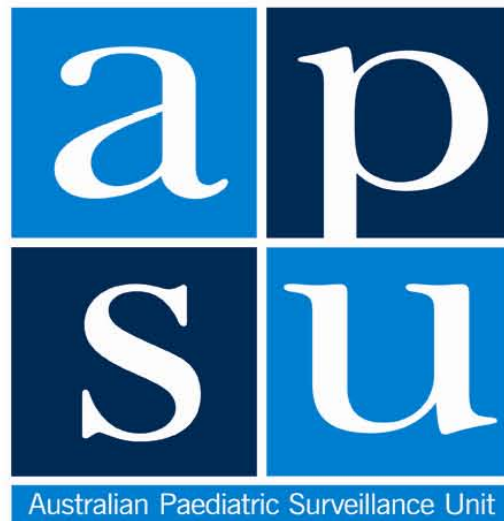

Australian Paediatric Surveillance Unit  
Level 2, Kids Research Institute | The Children's Hospital at Westmead  
Locked Bag 4001 | Westmead NSW 2145  
Tel: 02 9845 3005 | Fax: 02 9845 3082  
Email: [apsu@chw.edu.au](mailto:apsu@chw.edu.au) | Website: [www.apsu.org.au](http://www.apsu.org.au)
